# Supplementary material for: In situ observations of the isotopic composition of methane at the Cabauwtall tower site
Source: Copernicus journal article supplement (doi:10.5194/acp-16-10469-2016), 2016-08-19
Supplement: Supplementary file 1 [file acp-16-10469-2016-supplement.zip]

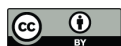

## *Supplement of*

# **In situ observations of the isotopic composition of methane at the Cabauw tall tower site**

**Thomas Röckmann et al.**

*Correspondence to:* Thomas Röckmann (t.roeckmann@uu.nl)

- [acp-16-10469-2016-supplement-title-page.pdf](#)
- [CBW\\_d13C\\_JRAS-M16\\_FINAL.txt](#)
- [CBW\\_dD\\_JRAS-M16\\_FINAL.txt](#)
- [\\_\\_MACOSX](#)
  - [.\\_CBW\\_d13C\\_JRAS-M16\\_FINAL.txt](#)
  - [.\\_CBW\\_dD\\_JRAS-M16\\_FINAL.txt](#)

The copyright of individual parts of the supplement might differ from the CC-BY 3.0 licence.
